# Supplementary material for: Inkjet-printed microelectrodes on PDMS as biosensors for functionalized microfluidic systems
Source: Royal Society of Chemistry journal article supplement (doi:10.1039/c4lc01121j), 2014-11-10
Supplement: c4lc01121j1.pdf [file c4lc01121j1.pdf]

### Electronic Supplementary Information

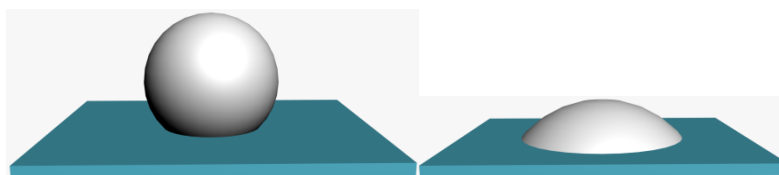

(a) Hydrophobic surface

(b) Hydrophilic surface

Fig. S1 Drop state of water on hydrophobic and hydrophilic surface, respectively

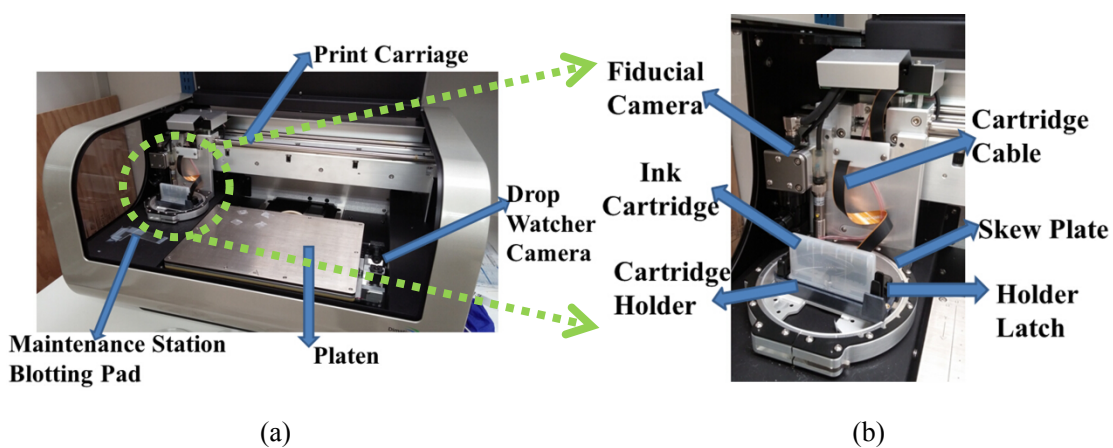

(a)

(b)

Fig. S2 The inkjet printing silver deposition system

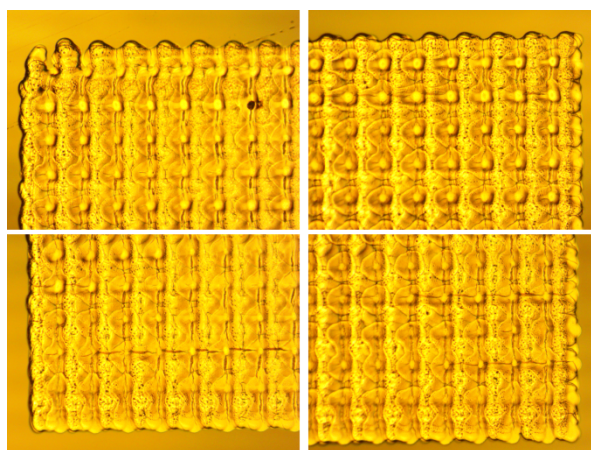

Fig. S3 2 mm \* 2 mm pad on MPTMS modified PDMS

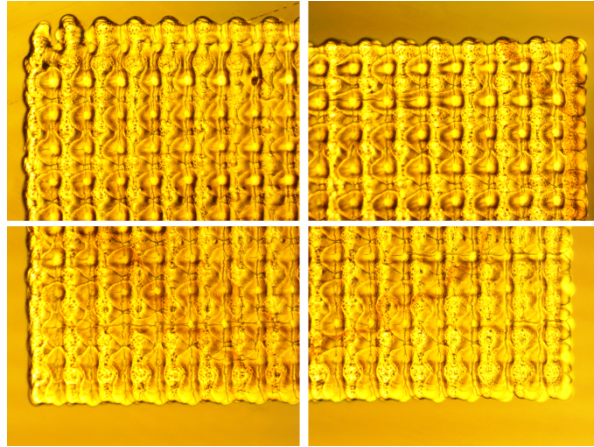

Fig. S4 The pad after immersion for two hours

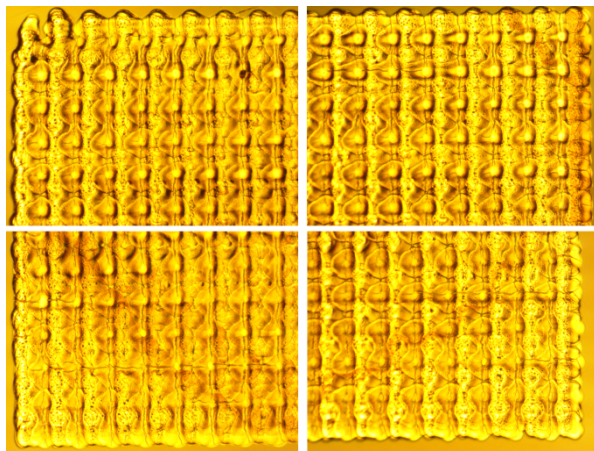

Fig. S5 The patterns after blowing with air stream for 5 minutes

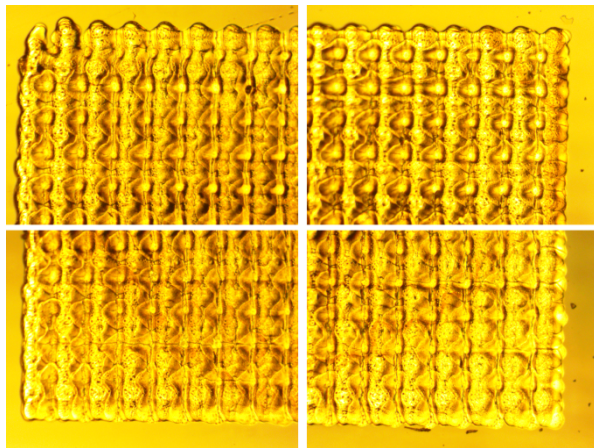

Fig. S6 The resulting patterns after ultrasonication test

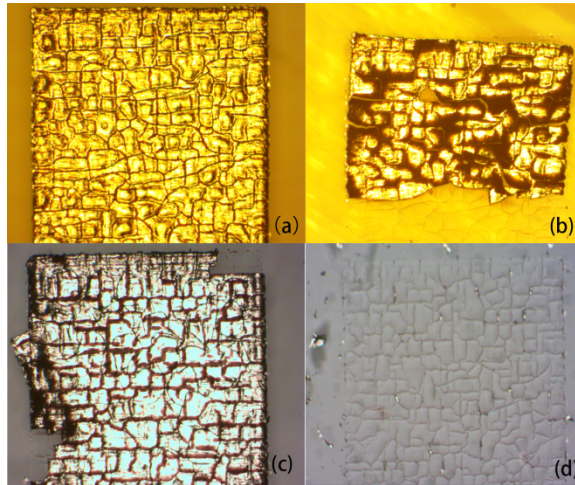

Fig. S7 (a) original 2 mm \* 2 mm pad on O<sub>2</sub> plasma treated PDMS, (b) pattern state after soaking test, (c) pattern state after blowing test, (d) pattern disappeared after ultrasonication test

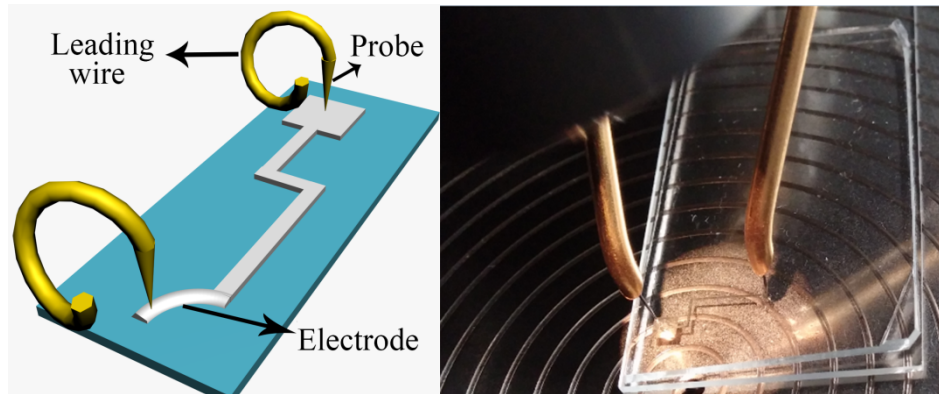

Fig. S8 The resistance measurement device under microscope
